# Supplementary material for: The genetic characterization of germplasm and identification of the litter size trait associated candidate genes in Dexin mutton and fine-wool sheep
Source: Front Genet. 2024 Aug 14;15:1457634. doi: 10.3389/fgene.2024.1457634 (PMC11359847; doi:10.3389/fgene.2024.1457634)
Supplement: Supplementary file 1 [file Table1.XLSX]

## Sheet: Supp Data. 1
Supplemental Data 1. Detailed information of the sequencing and alignment statistics for the 51 Dexin mutton & fine-wool sheep.
Sample ID	Raw Base(bp)	Clean Base(bp)	Effective Rate(%)	Error Rate(%)	GC Content(%)	Q20(%)	Q30(%)	Average depth(X)	Coverage at least 1X(%)	Mapping rate(%)
104	15733616100	1.57069e+10	99.83	0.03	42.58	99.25	96.71	5.98	98.19	99.87
109	31223442000	3.11985e+10	99.92	0.03	45.34	99.46	97.74	11.55	98.2	99.95
110（1）	21416685900	2.13888e+10	99.87	0.03	43.2	99.27	96.78	8.13	98.2	99.96
111	16651371000	1.66364e+10	99.91	0.03	43.05	99.33	96.99	6.32	98.17	99.86
112	21455382300	2.14039e+10	99.76	0.03	43.18	99.22	96.53	8.15	98.23	99.24
113	21370235400	2.13211e+10	99.77	0.03	43.43	99.13	96.18	7.33	98.2	99.86
114（1）	20868478800	2.08309e+10	99.82	0.03	43.98	99.26	96.73	5.98	98.17	99.47
115	18887955300	1.88577e+10	99.84	0.03	43.4	99.24	96.65	7.16	98.23	99.56
116	17699496900	1.76694e+10	99.83	0.03	43.36	98.33	94.54	6.72	98.21	99.87
117	20870263500	2.08139e+10	99.73	0.03	43.36	99.26	96.72	7.92	98.21	99.46
118	16629218100	1.6591e+10	99.77	0.03	43.26	98.3	94.43	6.31	98.18	99.73
119	17107065600	1.70848e+10	99.87	0.03	43.22	99.23	96.53	6.49	98.18	99.56
120	18260434500	1.82385e+10	99.88	0.03	43.21	98.34	94.56	6.93	98.17	99.52
121	17261026800	1.72369e+10	99.86	0.03	43.31	98.34	94.58	6.55	98.23	99.54
123	13891224000	1.38537e+10	99.73	0.03	43.3	98.34	94.54	5.27	98.26	99.46
124	21749263200	2.16971e+10	99.76	0.03	43.28	98.99	95.59	8.26	98.26	99.76
125	18231723000	1.81898e+10	99.77	0.03	43.42	99.18	96.39	6.92	98.25	99.82
126	21698751900	2.16619e+10	99.83	0.03	43.29	99.26	96.74	7.85	98.25	99.83
127	18032877900	1.80094e+10	99.87	0.03	43.34	99.23	96.57	6.85	98.23	99.84
128	21731761500	21688297977	99.8	0.03	43.4	99.21	96.51	8.25	98.17	99.75
129	14793781500	1.47701e+10	99.84	0.03	43.32	99.3	96.84	6.72	98.18	99.86
130	24030026400	2.39844e+10	99.81	0.03	43.87	99.26	96.71	9.12	98.17	99.73
131	21842395200	2.18074e+10	99.84	0.03	43.24	99.23	96.58	8.3	98.16	99.76
132	24191748000	2.41216e+10	99.71	0.03	43.41	99.26	96.73	9.18	98.14	99.51
133	18508941900	1.84664e+10	99.77	0.03	43.54	99.29	96.88	7.02	98.22	99.84
154	18208151700	1.81681e+10	99.78	0.03	42.38	99.26	96.73	6.91	98.17	99.76
156	23045555400	2.29902e+10	99.76	0.03	42.68	99.26	96.73	8.76	98.2	99.53
159	22958008500	2.29029e+10	99.76	0.03	42.41	99.27	96.8	8.72	98.2	99.83
161	22417027500	22381160256	99.84	0.03	42.1	99.13	96.2	8.51	98.24	99.86
22	22922439600	2.28835e+10	99.83	0.03	43.47	99.26	96.79	8.7	98.19	99.84
24	22797077700	2.27606e+10	99.84	0.03	43.34	99.22	96.57	8.65	98.17	99.83
25	21063291300	2.10254e+10	99.82	0.03	43.13	98.17	94.01	6.84	98.25	99.76
30	18070762200	1.804e+10	99.83	0.03	43.4	98.38	94.68	6.85	98.18	99.76
32	18597977700	1.8544e+10	99.71	0.03	43.41	99.23	96.59	7.06	98.16	99.48
34	22651971000	2.25976e+10	99.76	0.03	43.55	99.2	96.47	8.6	98.16	99.46
36	20013831000	1.99838e+10	99.85	0.03	43.14	98.38	94.66	7.6	98.15	99.85
37（1）	24506902800	2.44603e+10	99.81	0.03	43.31	99.24	96.62	6.88	98.22	99.76
38	23885669700	2.38427e+10	99.82	0.03	43.45	99.26	96.71	9.06	98.22	99.18
40	19076718000	1.905e+10	99.86	0.03	43.24	98.29	94.4	7.24	98.22	99.52
42	20790633300	2.07657e+10	99.88	0.03	43.56	99.24	96.67	5.97	98.17	99.34
43	19424431800	1.94011e+10	99.88	0.03	43.47	98.35	94.61	7.37	98.16	99.82
44	20541001500	2.0504e+10	99.82	0.03	43.2	98.31	94.44	7.78	98.16	99.46
46	15617936400	1.55961e+10	99.86	0.03	42.82	99.5	97.83	5.49	98.22	99.55
48	32257974000	3.22064e+10	99.84	0.03	44.82	99	96.62	8.01	98.2	99.72
49	20569959000	2.05268e+10	99.79	0.03	43.27	98.23	94.22	8.01	98.17	99.7
89	17494173900	1.74732e+10	99.88	0.03	42.41	99.36	97.06	6.64	98.18	99.82
91	21324447600	2.12989e+10	99.88	0.03	43.03	99.27	96.76	8.09	98.19	99.83
94	18381562200	1.83613e+10	99.89	0.03	42.15	99.25	96.69	6.98	98.22	99.82
95	19690982700	1.96792e+10	99.94	0.03	42.46	99.27	96.74	7.47	98.21	99.84
99	21032741100	2.10138e+10	99.91	0.03	42.83	99.28	96.83	7.98	98.2	99.86
2	20689547100	2.06544e+10	99.83	0.03	42.82	98.31	96.81	4.32	98.23	99.88

## Sheet: Supp Data. 2
Supplemental Data 2. Details on putative regions experiencing selected sweeps (top 1% empirical cutoff) for FST values on each chromosome.
Chromosome	Region start	Region end	FST
1	24150001	24250000	0.0587988
	104150001	104250000	0.058771
	103450001	103550000	0.0543957
	104100001	104200000	0.0535934
	103500001	103600000	0.0517472
	236650001	236750000	0.0498386
	251400001	251500000	0.0498097
	251450001	251550000	0.0496655
	50450001	50550000	0.048363
	56500001	56600000	0.0473478
	24100001	24200000	0.0452502
	104500001	104600000	0.0447076
	236700001	236800000	0.0441367
	233900001	234000000	0.0440161
	33350001	33450000	0.0431588
	11850001	11950000	0.0428673
	50400001	50500000	0.0418928
	56450001	56550000	0.0407326
	24200001	24300000	0.0406399
	27750001	27850000	0.0397277
	96150001	96250000	0.0390464
	258650001	258750000	0.038907
	23900001	24000000	0.036914
	65200001	65300000	0.0367736
	96200001	96300000	0.0362372
	97300001	97400000	0.0359448
	50550001	50650000	0.0357294
	23850001	23950000	0.0355162
	105550001	105650000	0.0354994
	22850001	22950000	0.0354
	169000001	169100000	0.035208
	33400001	33500000	0.0348278
	50600001	50700000	0.0339586
	236600001	236700000	0.0337838
	81250001	81350000	0.0326068
	35250001	35350000	0.0325926
	104450001	104550000	0.0321211
	27700001	27800000	0.0320042
	107050001	107150000	0.0317417
	65250001	65350000	0.0317204
	106800001	106900000	0.0311187
	233950001	234050000	0.0309167
	217700001	217800000	0.0306746
	33300001	33400000	0.0306336
	120600001	120700000	0.030598
	47600001	47700000	0.030544
	233850001	233950000	0.0302081
	85750001	85850000	0.0300766
	104000001	104100000	0.0300318
	102250001	102350000	0.0300204
	96900001	97000000	0.029982
	35300001	35400000	0.0294775
	251350001	251450000	0.0291544
	135200001	135300000	0.0289531
	107100001	107200000	0.0288868
	252100001	252200000	0.0286441
	95650001	95750000	0.0284984
	87150001	87250000	0.0283226
	22900001	23000000	0.0280198
	24250001	24350000	0.0275355
	50500001	50600000	0.0274868
	152150001	152250000	0.0274144
	104200001	104300000	0.0273711
	102200001	102300000	0.0272853
	64600001	64700000	0.027226
	97250001	97350000	0.0270218
	252150001	252250000	0.0270098
2	196350001	196450000	0.0582263
	111500001	111600000	0.0540243
	39300001	39400000	0.0525311
	221150001	221250000	0.0523324
	111550001	111650000	0.049196
	98900001	99000000	0.0443478
	109000001	109100000	0.0436699
	196300001	196400000	0.0436423
	12350001	12450000	0.0429004
	39350001	39450000	0.0406022
	221100001	221200000	0.0397888
	196400001	196500000	0.0387612
	111450001	111550000	0.0367684
	116900001	117000000	0.036691
	98600001	98700000	0.0362939
	33250001	33350000	0.0355077
	33300001	33400000	0.0349399
	116950001	117050000	0.0341377
	29200001	29300000	0.0341312
	108950001	109050000	0.0336803
	195000001	195100000	0.0329014
	245100001	245200000	0.0326134
	57450001	57550000	0.0325035
	38200001	38300000	0.0324147
	100950001	101050000	0.0324034
	117000001	117100000	0.031875
	61600001	61700000	0.0318236
	98650001	98750000	0.0315318
	57500001	57600000	0.0314437
	98850001	98950000	0.0312541
	194800001	194900000	0.0307119
	59500001	59600000	0.0304207
	162600001	162700000	0.0299754
	110450001	110550000	0.0295315
	104000001	104100000	0.0292429
	12400001	12500000	0.0286584
	57750001	57850000	0.0279815
	29150001	29250000	0.0278276
	213000001	213100000	0.0276469
	19150001	19250000	0.0272513
	213050001	213150000	0.0271391
	111600001	111700000	0.0271108
	101750001	101850000	0.0271045
	111400001	111500000	0.0270893
3	67300001	67400000	0.0693551
	67250001	67350000	0.0666788
	181350001	181450000	0.066655
	108900001	109000000	0.0600576
	181300001	181400000	0.0543982
	134150001	134250000	0.0543149
	134200001	134300000	0.0522891
	73950001	74050000	0.0415327
	134100001	134200000	0.0388348
	19050001	19150000	0.0386858
	34550001	34650000	0.0382423
	108950001	109050000	0.038096
	108850001	108950000	0.0375222
	65800001	65900000	0.0372654
	74000001	74100000	0.0371365
	78350001	78450000	0.036705
	19000001	19100000	0.0363292
	182250001	182350000	0.0354693
	76800001	76900000	0.0353397
	164400001	164500000	0.0352641
	148000001	148100000	0.0351359
	117400001	117500000	0.034973
	67200001	67300000	0.0334354
	65850001	65950000	0.0329556
	190400001	190500000	0.0320639
	78300001	78400000	0.0308947
	77550001	77650000	0.0308943
	160050001	160150000	0.0305326
	73850001	73950000	0.0304853
	140650001	140750000	0.0303652
	182300001	182400000	0.0301622
	166650001	166750000	0.0296059
	160000001	160100000	0.0293551
	73700001	73800000	0.029354
	39700001	39800000	0.0292764
	59700001	59800000	0.0292336
	154500001	154600000	0.0288944
	36550001	36650000	0.0288735
	48450001	48550000	0.028857
	18350001	18450000	0.0288455
	14800001	14900000	0.0288338
	166600001	166700000	0.0283668
	59750001	59850000	0.0282362
	144050001	144150000	0.028069
	67150001	67250000	0.027945
	76750001	76850000	0.0279186
	190150001	190250000	0.0279147
	122600001	122700000	0.0277135
	48500001	48600000	0.0274409
	140600001	140700000	0.0274142
	215850001	215950000	0.0270606
	133050001	133150000	0.0269665
4	900001	1000000	0.0588486
	96700001	96800000	0.0467859
	96750001	96850000	0.0431124
	81400001	81500000	0.0430808
	70500001	70600000	0.0409426
	50100001	50200000	0.0403653
	80700001	80800000	0.0398819
	81350001	81450000	0.0397184
	50050001	50150000	0.039288
	64250001	64350000	0.0380879
	98200001	98300000	0.0373857
	57900001	58000000	0.036201
	96650001	96750000	0.0334605
	70550001	70650000	0.0332461
	80750001	80850000	0.0325184
	57950001	58050000	0.0322314
	850001	950000	0.0317077
	98150001	98250000	0.0313575
	96800001	96900000	0.0304019
	116150001	116250000	0.0302381
	50000001	50100000	0.0298639
	64300001	64400000	0.0277714
	80650001	80750000	0.0274778
	92250001	92350000	0.0272945
	92700001	92800000	0.0272114
	92750001	92850000	0.0269895
5	104300001	104400000	0.0436924
	104250001	104350000	0.0380759
	51400001	51500000	0.0376501
	47350001	47450000	0.0375173
	47300001	47400000	0.0355652
	51350001	51450000	0.0346393
	25300001	25400000	0.032534
6	33400001	33500000	0.0530601
	28950001	29050000	0.0497468
	33450001	33550000	0.0470522
	33100001	33200000	0.0468321
	33150001	33250000	0.0415831
	33350001	33450000	0.041454
	33300001	33400000	0.0389972
	32750001	32850000	0.0381173
	17000001	17100000	0.0378548
	52850001	52950000	0.0365272
	25350001	25450000	0.036512
	29000001	29100000	0.0357621
	43450001	43550000	0.0354962
	110800001	110900000	0.0351346
	113300001	113400000	0.0350275
	69100001	69200000	0.0349253
	33250001	33350000	0.0342108
	67450001	67550000	0.0331914
	25400001	25500000	0.0327491
	113150001	113250000	0.0326979
	71300001	71400000	0.0326931
	62350001	62450000	0.032369
	33550001	33650000	0.0320488
	32900001	33000000	0.0312639
	25300001	25400000	0.0310565
	1000001	1100000	0.0310531
	33500001	33600000	0.0310274
	72200001	72300000	0.0310175
	67400001	67500000	0.0309742
	25450001	25550000	0.0308684
	64150001	64250000	0.0306356
	62600001	62700000	0.0300593
	79200001	79300000	0.0296807
	45300001	45400000	0.0295616
	62650001	62750000	0.0295527
	33200001	33300000	0.0290974
	87700001	87800000	0.0288147
	43500001	43600000	0.0282774
	62300001	62400000	0.0281947
	29050001	29150000	0.0279262
	34150001	34250000	0.027365
	32350001	32450000	0.0272747
	31350001	31450000	0.0272103
	33600001	33700000	0.0269762
	69050001	69150000	0.0268808
7	18300001	18400000	0.071919
	18250001	18350000	0.0599455
	25900001	26000000	0.0428323
	66950001	67050000	0.0356535
	25850001	25950000	0.0346947
	53600001	53700000	0.0345271
	21300001	21400000	0.0335361
	31950001	32050000	0.0326571
	32100001	32200000	0.0316525
	18800001	18900000	0.0313931
	18650001	18750000	0.0309802
	20650001	20750000	0.0306852
	93800001	93900000	0.0304626
	67000001	67100000	0.0301371
	18750001	18850000	0.0287497
	38500001	38600000	0.0287123
	29950001	30050000	0.0281401
	18700001	18800000	0.0277001
	20600001	20700000	0.0272097
	73050001	73150000	0.0271963
	30000001	30100000	0.0271553
	57100001	57200000	0.0269664
	32050001	32150000	0.0268564
8	39050001	39150000	0.041095
	10800001	10900000	0.0373672
	10850001	10950000	0.0329972
	79500001	79600000	0.0288074
	79550001	79650000	0.0286609
	29900001	30000000	0.0279346
	76350001	76450000	0.0277619
	68900001	69000000	0.0269
9	30950001	31050000	0.0564786
	31000001	31100000	0.0442303
	89550001	89650000	0.0366879
	91700001	91800000	0.0343608
	48250001	48350000	0.0341021
	91750001	91850000	0.0334485
	89300001	89400000	0.0330827
	84950001	85050000	0.031472
	85000001	85100000	0.0307632
	89600001	89700000	0.0303417
	69000001	69100000	0.0289235
	89500001	89600000	0.027494
	83100001	83200000	0.0270628
10	20250001	20350000	0.0337824
	20300001	20400000	0.0278774
11	59550001	59650000	0.03433
	10900001	11000000	0.0288999
	10950001	11050000	0.0280008
	18750001	18850000	0.0279259
	42050001	42150000	0.0272357
12	80150001	80250000	0.053612
	80250001	80350000	0.0452876
	80200001	80300000	0.0446826
	8100001	8200000	0.0380633
	80300001	80400000	0.0379418
	8150001	8250000	0.0370788
	79950001	80050000	0.0368388
	72150001	72250000	0.0362751
	11750001	11850000	0.0361357
	49200001	49300000	0.03479
	6450001	6550000	0.0345431
	79900001	80000000	0.0340552
	51000001	51100000	0.0310261
	51050001	51150000	0.0308853
	80100001	80200000	0.030373
	80350001	80450000	0.0297285
	53050001	53150000	0.0292804
	79850001	79950000	0.0288776
13	78850001	78950000	0.0583516
	52750001	52850000	0.0541158
	26850001	26950000	0.0514496
	26900001	27000000	0.0482845
	53550001	53650000	0.0468305
	46900001	47000000	0.0446226
	26800001	26900000	0.0435038
	53500001	53600000	0.041898
	52700001	52800000	0.0413275
	53600001	53700000	0.0408263
	28500001	28600000	0.0406953
	29600001	29700000	0.0400887
	46850001	46950000	0.0394241
	52800001	52900000	0.0392824
	29550001	29650000	0.0378458
	46950001	47050000	0.0373279
	47000001	47100000	0.0359272
	26750001	26850000	0.0357639
	78900001	79000000	0.0354573
	49050001	49150000	0.0318048
	16850001	16950000	0.0306383
	78800001	78900000	0.0297134
	70450001	70550000	0.0295044
	28550001	28650000	0.0293656
	950001	1050000	0.028958
	16900001	17000000	0.0280678
14	47000001	47100000	0.0435035
	46950001	47050000	0.0350715
	24650001	24750000	0.0320602
	18450001	18550000	0.0279768
15	32350001	32450000	0.04483
	11200001	11300000	0.043928
	32300001	32400000	0.0434859
	10550001	10650000	0.0434271
	65550001	65650000	0.0401093
	45650001	45750000	0.039664
	11800001	11900000	0.0388076
	65500001	65600000	0.0383559
	45600001	45700000	0.0370591
	45550001	45650000	0.0365118
	24500001	24600000	0.0362679
	11750001	11850000	0.0360935
	44800001	44900000	0.0343811
	44850001	44950000	0.0339611
	11700001	11800000	0.0330326
	75900001	76000000	0.029569
	45500001	45600000	0.0294191
	5100001	5200000	0.0293857
	10500001	10600000	0.0293409
	27800001	27900000	0.0292875
	32500001	32600000	0.0286835
	11250001	11350000	0.0285672
	10600001	10700000	0.0281966
	24550001	24650000	0.0281
	5150001	5250000	0.0280968
	75550001	75650000	0.0274218
	45100001	45200000	0.0273023
	11150001	11250000	0.0271164
16	44450001	44550000	0.0582269
	45250001	45350000	0.0460787
	70850001	70950000	0.045237
	6850001	6950000	0.041263
	44400001	44500000	0.0411259
	45550001	45650000	0.0409786
	44500001	44600000	0.0407484
	49700001	49800000	0.0368468
	49650001	49750000	0.0366566
	45300001	45400000	0.0365772
	45500001	45600000	0.0355797
	70800001	70900000	0.0334813
	24000001	24100000	0.0333438
	70900001	71000000	0.0323722
	56150001	56250000	0.0323398
	43700001	43800000	0.0314007
	46800001	46900000	0.0303163
	47150001	47250000	0.0291438
	49100001	49200000	0.0289151
	6800001	6900000	0.0288912
	58900001	59000000	0.0281713
	58950001	59050000	0.0281688
	21150001	21250000	0.0273777
	44550001	44650000	0.02703
	70700001	70800000	0.02701
17	58800001	58900000	0.0459329
	58850001	58950000	0.0434846
	5350001	5450000	0.0386844
	43300001	43400000	0.0383824
	54550001	54650000	0.037775
	5400001	5500000	0.0355664
	58750001	58850000	0.0343875
	19550001	19650000	0.0339769
	19600001	19700000	0.0331054
	43350001	43450000	0.0323465
	8850001	8950000	0.0319462
	54600001	54700000	0.0290766
	11450001	11550000	0.0285357
	32850001	32950000	0.0279658
18	64900001	65000000	0.0503232
	28300001	28400000	0.0441749
	28250001	28350000	0.037981
	26950001	27050000	0.036253
	36800001	36900000	0.0336297
	36750001	36850000	0.0312731
	15400001	15500000	0.0307563
	31450001	31550000	0.0297393
	31000001	31100000	0.0289165
	15600001	15700000	0.0282026
	36850001	36950000	0.0281792
	64850001	64950000	0.02768
19	23300001	23400000	0.0372392
	54150001	54250000	0.0368715
	54100001	54200000	0.0345792
	40500001	40600000	0.034507
	40450001	40550000	0.0332959
	21050001	21150000	0.0317356
	39700001	39800000	0.0306455
	23250001	23350000	0.0299385
	23350001	23450000	0.0285535
	40550001	40650000	0.0280316
	21000001	21100000	0.027816
20	17150001	17250000	0.0366883
	17200001	17300000	0.0335092
	11050001	11150000	0.032894
21	600001	700000	0.0304084
	550001	650000	0.0290808
	11600001	11700000	0.0270799
22	39350001	39450000	0.035643
	49000001	49100000	0.0335071
	12500001	12600000	0.0331955
	39400001	39500000	0.0275161
	10150001	10250000	0.0270943
23	350001	450000	0.0337506
	6400001	6500000	0.0333594
	36550001	36650000	0.0293785
	6450001	6550000	0.0292621
	36500001	36600000	0.0284497
	57450001	57550000	0.0277872
	300001	400000	0.0270357
25	22950001	23050000	0.0511113
	23000001	23100000	0.0426688
	25650001	25750000	0.0318441
	23700001	23800000	0.0300511
	26500001	26600000	0.0296873
	22900001	23000000	0.0294719
	23050001	23150000	0.0292031
	23100001	23200000	0.028834
	2200001	2300000	0.0288003
	23250001	23350000	0.028012
	23750001	23850000	0.0272683
26	20500001	20600000	0.0559264
	20550001	20650000	0.0467901
	28600001	28700000	0.0419868
	22300001	22400000	0.038165
	28500001	28600000	0.037999
	39950001	40050000	0.0379404
	27950001	28050000	0.0370906
	19600001	19700000	0.0369114
	20450001	20550000	0.0366724
	27700001	27800000	0.0354562
	27550001	27650000	0.0343307
	39900001	40000000	0.0341613
	27900001	28000000	0.0336933
	36450001	36550000	0.0336658
	27650001	27750000	0.0336352
	28550001	28650000	0.0328654
	27400001	27500000	0.0327406
	27750001	27850000	0.032406
	21500001	21600000	0.0320741
	27350001	27450000	0.0317756
	21450001	21550000	0.0313399
	27600001	27700000	0.0311414
	20600001	20700000	0.0309841
	19650001	19750000	0.0302829
	27150001	27250000	0.0302607
	28450001	28550000	0.0301829
	22350001	22450000	0.030046
	12250001	12350000	0.0300096
	28650001	28750000	0.0295597
	27500001	27600000	0.0294856
	12300001	12400000	0.0294179
	37300001	37400000	0.0287204
	39800001	39900000	0.0284766
	22400001	22500000	0.0283182
	21600001	21700000	0.0281367
	21550001	21650000	0.0271948

## Sheet: Supp Data. 3
Supplemental Data 3. Details on putative regions experiencing selected sweeps (top 1% empirical cutoff) for pi ratio values on each chromosome.
Chromosome	Region start	Region end	Pi_Ratio
1	130050001	130150000	2.75298
	66450001	66550000	2.72158
	51350001	51450000	1.85539
	130000001	130100000	1.82635
	236950001	237050000	1.81984
	24100001	24200000	1.72462
	51300001	51400000	1.70855
	51400001	51500000	1.70598
	24150001	24250000	1.70483
	252900001	253000000	1.67012
	27750001	27850000	1.66426
	24200001	24300000	1.64177
	99900001	100000000	1.63465
	135250001	135350000	1.62866
	130100001	130200000	1.59394
	198200001	198300000	1.59096
	24050001	24150000	1.5846
	66600001	66700000	1.56163
	198150001	198250000	1.53932
	81300001	81400000	1.53302
	81250001	81350000	1.52202
	237000001	237100000	1.51874
	242650001	242750000	1.5153
	135200001	135300000	1.50237
	187750001	187850000	1.49156
	198250001	198350000	1.48929
	26500001	26600000	1.48403
	80050001	80150000	1.48259
	233950001	234050000	1.48019
	237450001	237550000	1.47623
	26450001	26550000	1.47519
2	194950001	195050000	2.2621
	195000001	195100000	2.16864
	39300001	39400000	2.13765
	215350001	215450000	2.03611
	215300001	215400000	1.79702
	123750001	123850000	1.72593
	220450001	220550000	1.66688
	90700001	90800000	1.63584
	123700001	123800000	1.63477
	116250001	116350000	1.59796
	215400001	215500000	1.5829
	211050001	211150000	1.56684
	195650001	195750000	1.56114
	186050001	186150000	1.54454
	71850001	71950000	1.54312
	123800001	123900000	1.54192
	71650001	71750000	1.53915
	71700001	71800000	1.53386
	220400001	220500000	1.5254
	123650001	123750000	1.52195
	110200001	110300000	1.50948
	52150001	52250000	1.5094
	195050001	195150000	1.50142
	52200001	52300000	1.50132
	52250001	52350000	1.49381
	71600001	71700000	1.4932
	71550001	71650000	1.48587
	168350001	168450000	1.48463
	220500001	220600000	1.47963
3	154050001	154150000	2.37679
	181300001	181400000	2.03673
	18350001	18450000	1.85674
	181350001	181450000	1.82402
	215300001	215400000	1.78645
	142100001	142200000	1.65881
	154000001	154100000	1.59776
	129150001	129250000	1.5736
	142050001	142150000	1.56708
	195050001	195150000	1.55219
	194950001	195050000	1.52682
	177200001	177300000	1.52636
	195000001	195100000	1.51842
	39100001	39200000	1.51827
	18400001	18500000	1.51501
	148250001	148350000	1.49725
	38200001	38300000	1.49119
	187050001	187150000	1.4905
4	80700001	80800000	1.68582
	18550001	18650000	1.5275
	2150001	2250000	1.4788
5	107800001	107900000	2.54904
	108000001	108100000	2.50642
	108050001	108150000	2.49196
	108100001	108200000	2.46871
	108150001	108250000	2.4617
	107750001	107850000	2.3626
	107950001	108050000	2.23638
	107850001	107950000	1.86574
	107900001	108000000	1.85137
	107700001	107800000	1.8231
	99750001	99850000	1.75019
	107500001	107600000	1.65773
	99700001	99800000	1.63222
	92400001	92500000	1.57838
	250001	350000	1.53861
	14500001	14600000	1.52657
	67500001	67600000	1.51011
6	25050001	25150000	3.15742
	25000001	25100000	2.8106
	66750001	66850000	2.03395
	33150001	33250000	1.98743
	25100001	25200000	1.95372
	37350001	37450000	1.907
	33100001	33200000	1.8218
	71200001	71300000	1.81566
	33200001	33300000	1.79923
	45300001	45400000	1.76401
	45150001	45250000	1.74212
	45200001	45300000	1.72334
	45250001	45350000	1.70739
	33050001	33150000	1.64678
	25150001	25250000	1.61276
	32750001	32850000	1.61167
	66700001	66800000	1.60886
	24950001	25050000	1.57898
	38800001	38900000	1.55397
	30150001	30250000	1.55238
	37400001	37500000	1.54484
	117500001	117600000	1.51551
	33800001	33900000	1.51158
	31150001	31250000	1.49546
	33750001	33850000	1.49265
7	32000001	32100000	1.75704
	38500001	38600000	1.59623
	99850001	99950000	1.51859
8	32100001	32200000	2.39363
	32050001	32150000	2.27988
	29900001	30000000	2.11101
	32150001	32250000	2.07885
	32200001	32300000	1.96496
	32350001	32450000	1.88936
	23900001	24000000	1.72373
	32250001	32350000	1.69766
	32000001	32100000	1.67637
	8100001	8200000	1.64432
	26200001	26300000	1.63537
	32300001	32400000	1.61802
	23850001	23950000	1.59338
	32400001	32500000	1.59284
	32550001	32650000	1.544
	24150001	24250000	1.51366
	44300001	44400000	1.49524
	29850001	29950000	1.48281
9	77400001	77500000	2.21187
	77350001	77450000	2.15666
	25550001	25650000	2.13426
	38050001	38150000	1.56374
	25600001	25700000	1.53983
	31100001	31200000	1.49339
	64000001	64100000	1.48491
10	37500001	37600000	1.48136
	54600001	54700000	1.47697
11	10900001	11000000	5.7612
	10950001	11050000	2.17466
	40450001	40550000	1.47649
12	79950001	80050000	3.73013
	79900001	80000000	3.59021
	79850001	79950000	3.08122
	79800001	79900000	2.41639
	80200001	80300000	2.38419
	80150001	80250000	2.3472
	80000001	80100000	2.31725
	80250001	80350000	2.29107
	80100001	80200000	2.02919
	80300001	80400000	1.91813
	80050001	80150000	1.77878
	80350001	80450000	1.71982
	22650001	22750000	1.52423
	53050001	53150000	1.49451
	5500001	5600000	1.48192
	79750001	79850000	1.47564
13	50000001	50100000	2.66488
	50050001	50150000	2.08022
	62950001	63050000	1.9482
	38000001	38100000	1.83981
	49250001	49350000	1.7217
	52800001	52900000	1.70244
	37950001	38050000	1.66014
	49950001	50050000	1.65627
	63000001	63100000	1.6518
	49450001	49550000	1.59955
	49400001	49500000	1.5094
14	52150001	52250000	1.85176
	52200001	52300000	1.63368
	16250001	16350000	1.62086
	16200001	16300000	1.59294
15	48100001	48200000	2.00911
	65550001	65650000	1.48088
16	71350001	71450000	2.4373
	71400001	71500000	2.00682
	71300001	71400000	1.72028
	52200001	52300000	1.56569
	52150001	52250000	1.54019
18	31450001	31550000	1.59565
	4300001	4400000	1.5832
	17500001	17600000	1.53182
	17550001	17650000	1.47822
19	43450001	43550000	1.75422
	43400001	43500000	1.70979
	22100001	22200000	1.70802
	43500001	43600000	1.66536
	22150001	22250000	1.64686
	37700001	37800000	1.59873
	150001	250000	1.57163
	43350001	43450000	1.53359
	2250001	2350000	1.49005
20	15050001	15150000	2.56529
	3350001	3450000	1.53146
	3300001	3400000	1.47698
21	1	100000	4.81799
	34950001	35050000	4.18398
	47200001	47300000	2.63838
	44950001	45050000	2.46152
	39250001	39350000	2.32967
	47400001	47500000	2.27723
	44900001	45000000	2.23712
	47150001	47250000	2.13278
	33700001	33800000	2.09649
	23650001	23750000	2.09046
	43600001	43700000	2.05241
	12200001	12300000	2.03395
	45700001	45800000	1.9981
	36300001	36400000	1.99422
	37700001	37800000	1.94101
	16050001	16150000	1.92068
	19850001	19950000	1.88796
	46300001	46400000	1.87584
	34900001	35000000	1.84627
	39200001	39300000	1.83072
	8700001	8800000	1.82102
	23700001	23800000	1.75426
	500001	600000	1.7509
	40000001	40100000	1.72677
	9300001	9400000	1.71849
	43050001	43150000	1.71182
	40300001	40400000	1.71178
	47000001	47100000	1.6977
	21950001	22050000	1.69553
	15700001	15800000	1.69194
	2600001	2700000	1.68755
	26600001	26700000	1.68547
	36250001	36350000	1.67932
	22300001	22400000	1.67682
	5200001	5300000	1.67679
	35700001	35800000	1.67241
	41000001	41100000	1.66983
	8950001	9050000	1.66908
	6850001	6950000	1.66533
	550001	650000	1.63964
	37300001	37400000	1.6362
	24600001	24700000	1.634
	41400001	41500000	1.62952
	7750001	7850000	1.62946
	40050001	40150000	1.59134
	43550001	43650000	1.58103
	27050001	27150000	1.55629
	11950001	12050000	1.54197
	7200001	7300000	1.53773
	23000001	23100000	1.52814
	46500001	46600000	1.51433
	20000001	20100000	1.51207
	10500001	10600000	1.51108
	12000001	12100000	1.50572
	26400001	26500000	1.50541
	10750001	10850000	1.50421
	7250001	7350000	1.50182
	41350001	41450000	1.49726
	39400001	39500000	1.49449
	31200001	31300000	1.47633
22	1	100000	3.10112
	22450001	22550000	2.58539
	22250001	22350000	2.52553
	41650001	41750000	2.45757
	22850001	22950000	2.18879
	20150001	20250000	2.12269
	21900001	22000000	2.07251
	13750001	13850000	2.02224
	41900001	42000000	2.00162
	22050001	22150000	1.97438
	8850001	8950000	1.96492
	22400001	22500000	1.90865
	50400001	50500000	1.88913
	22650001	22750000	1.87449
	20900001	21000000	1.83117
	15850001	15950000	1.77751
	48250001	48350000	1.75628
	48300001	48400000	1.74391
	13450001	13550000	1.72874
	42150001	42250000	1.69679
	23800001	23900000	1.67974
	40750001	40850000	1.66573
	3250001	3350000	1.662
	15900001	16000000	1.65665
	30900001	31000000	1.64943
	16050001	16150000	1.64807
	40500001	40600000	1.63762
	21150001	21250000	1.63579
	22500001	22600000	1.61597
	40300001	40400000	1.60388
	21850001	21950000	1.59505
	40700001	40800000	1.58607
	17900001	18000000	1.56989
	50900001	51000000	1.56934
	33100001	33200000	1.56427
	19200001	19300000	1.56185
	38650001	38750000	1.56107
	2450001	2550000	1.55968
	32050001	32150000	1.55664
	2650001	2750000	1.54141
	1200001	1300000	1.54114
	46000001	46100000	1.53952
	13050001	13150000	1.53543
	19950001	20050000	1.533
	44650001	44750000	1.5329
	41600001	41700000	1.52273
	43900001	44000000	1.51934
	40900001	41000000	1.50858
	3800001	3900000	1.50186
	16550001	16650000	1.49468
	1600001	1700000	1.49307
	15450001	15550000	1.49304
	15700001	15800000	1.49237
	51400001	51500000	1.48472
	15650001	15750000	1.48439
	21100001	21200000	1.48418
23	100001	200000	7.38352
	62350001	62450000	3.67227
	61100001	61200000	2.71648
	400001	500000	2.34367
	60850001	60950000	2.12419
	62300001	62400000	2.12156
	50650001	50750000	2.06008
	33850001	33950000	2.01931
	50001	150000	2.004
	41850001	41950000	1.97197
	43500001	43600000	1.95782
	40500001	40600000	1.93574
	37350001	37450000	1.92538
	16400001	16500000	1.88425
	40550001	40650000	1.85896
	350001	450000	1.83568
	21300001	21400000	1.80667
	30800001	30900000	1.75122
	49650001	49750000	1.71205
	41800001	41900000	1.68903
	2450001	2550000	1.6648
	17500001	17600000	1.63122
	14850001	14950000	1.62682
	43250001	43350000	1.62646
	850001	950000	1.61259
	19950001	20050000	1.61133
	8950001	9050000	1.59231
	50750001	50850000	1.5862
	47600001	47700000	1.58074
	25300001	25400000	1.55477
	14600001	14700000	1.55208
	61650001	61750000	1.54155
	13700001	13800000	1.53702
	43450001	43550000	1.5367
	50100001	50200000	1.52871
	14100001	14200000	1.52857
	15900001	16000000	1.52319
	49250001	49350000	1.52209
	39200001	39300000	1.51803
	56950001	57050000	1.51723
	1500001	1600000	1.51299
	33900001	34000000	1.50859
	37300001	37400000	1.50576
	6200001	6300000	1.50358
	44650001	44750000	1.49919
	38550001	38650000	1.49154
	49000001	49100000	1.49068
	50050001	50150000	1.48804
	49600001	49700000	1.48234
	7150001	7250000	1.48092
	16050001	16150000	1.47744
	12800001	12900000	1.47725
24	10800001	10900000	4.76889
	2700001	2800000	3.637
	42550001	42650000	3.0637
	35050001	35150000	2.47288
	550001	650000	2.39399
	33150001	33250000	2.28313
	19700001	19800000	2.26384
	26500001	26600000	2.25878
	39000001	39100000	2.25152
	16850001	16950000	2.24774
	33200001	33300000	2.20539
	38950001	39050000	2.13448
	10850001	10950000	2.12552
	22650001	22750000	1.94212
	35100001	35200000	1.92235
	28500001	28600000	1.91502
	400001	500000	1.85299
	3950001	4050000	1.83311
	28450001	28550000	1.8162
	3550001	3650000	1.75453
	25250001	25350000	1.74151
	42300001	42400000	1.73243
	41850001	41950000	1.69349
	25200001	25300000	1.69341
	36700001	36800000	1.6814
	26050001	26150000	1.65933
	39500001	39600000	1.64507
	13400001	13500000	1.64464
	17550001	17650000	1.64449
	26950001	27050000	1.63289
	16800001	16900000	1.63228
	18850001	18950000	1.63151
	36100001	36200000	1.61997
	31300001	31400000	1.61666
	10750001	10850000	1.59379
	10000001	10100000	1.57217
	26650001	26750000	1.55683
	13800001	13900000	1.53736
	2650001	2750000	1.52465
	17500001	17600000	1.52262
	26250001	26350000	1.51863
	33900001	34000000	1.51115
	13250001	13350000	1.51018
	19000001	19100000	1.50456
	36550001	36650000	1.50399
	34350001	34450000	1.50387
	13200001	13300000	1.48788
	3900001	4000000	1.47735
25	44800001	44900000	17.7908
	6650001	6750000	5.44711
	16800001	16900000	2.50103
	17950001	18050000	2.47602
	6600001	6700000	2.40942
	3400001	3500000	2.01261
	18500001	18600000	1.98505
	3350001	3450000	1.96051
	44750001	44850000	1.92507
	18550001	18650000	1.86309
	17900001	18000000	1.82057
	6900001	7000000	1.7903
	7000001	7100000	1.76587
	29550001	29650000	1.71961
	32700001	32800000	1.71737
	40250001	40350000	1.71465
	7700001	7800000	1.71037
	10800001	10900000	1.70989
	40100001	40200000	1.69585
	9500001	9600000	1.69225
	7650001	7750000	1.67769
	8150001	8250000	1.64112
	11250001	11350000	1.60216
	27350001	27450000	1.5774
	10750001	10850000	1.57659
	13000001	13100000	1.54549
	6550001	6650000	1.5371
	23850001	23950000	1.51971
	26100001	26200000	1.5196
	27050001	27150000	1.51148
	21000001	21100000	1.50774
	12350001	12450000	1.47963
	8700001	8800000	1.47825
	10400001	10500000	1.47592
	29250001	29350000	1.4754
26	1	100000	7.16176
	44950001	45050000	2.61135
	33150001	33250000	1.941
	32350001	32450000	1.91556
	44500001	44600000	1.90724
	20600001	20700000	1.90394
	36400001	36500000	1.79352
	10100001	10200000	1.78747
	18300001	18400000	1.70161
	9050001	9150000	1.68415
	39600001	39700000	1.6723
	36950001	37050000	1.64665
	35800001	35900000	1.64027
	22550001	22650000	1.63765
	15700001	15800000	1.62574
	24650001	24750000	1.62265
	25500001	25600000	1.6219
	13950001	14050000	1.61575
	34250001	34350000	1.59997
	31150001	31250000	1.57743
	18800001	18900000	1.56243
	5450001	5550000	1.55013
	3450001	3550000	1.54739
	19850001	19950000	1.53677
	9300001	9400000	1.51208
	34450001	34550000	1.50784
	9100001	9200000	1.4993
	35400001	35500000	1.49747
	20850001	20950000	1.49421
	24150001	24250000	1.49312
	38950001	39050000	1.48714
	5000001	5100000	1.48167
	24400001	24500000	1.47847
	7150001	7250000	1.47615
